# Supplementary material for: Development of novel inorganic–organic hybrid nanocomposites as a recyclable adsorbent and catalyst
Source: Royal Society of Chemistry journal article supplement (doi:10.1039/c4ra03684k), 2014-07-21
Supplement: c4ra03684k1.pdf [file c4ra03684k1.pdf]

## Electronic Supplementary Information

# Development of novel inorganic-organic hybrid nanocomposites as recyclable adsorbent and catalyst

*Subhra Jana\* and Sankar Das*

Department of Chemical, Biological & Macro-Molecular Sciences, S. N. Bose National Centre for Basic Sciences, Sector-III, Block - JD, Salt Lake, Kolkata - 700 098, India. E-mail: subhra.jana@bose.res.in

### Materials:

All chemicals were used as received. Halloysite nanotubes, gold(III) chloride trihydrate ( $\geq 99.9\%$ ), silver nitrate (99.9999%), (3-mercaptopropyl) trimethoxysilane (MPTMS, 97%), 1-octadecene, and oleylamine (70%) were purchased from Sigma-Aldrich. Toluene was obtained from Merck, India and *o*-nitrobenzoic acid (*o*-NBA) was from Alfa Aesar. Mercury acetate, lead nitrate, and cadmium acetate were received from Sisco Research Laboratory, India.

### Adsorption Studies:

To study the adsorption of heavy metals ions from aqueous solution using Mod-HNTs at room temperature, Hg(II) solution was taken in beaker along with Mod-HNTs and then the solution was stirred on a magnetic stirrer up to a desired time. After the adsorption of Hg(II) ions by Mod-HNTs, the solution was filtered and the unbound Hg(II) ions present in the filtrate was estimated by a complexing agent, diphenylthiocarbazone (dithizone) which forms a complex with Hg(II) ions. The time-dependent absorption spectra of mercury-dithizone complex have been studied using a UV-Visible spectrophotometer in a standard quartz cuvette of 1 cm path length. Keeping all the experimental condition the same, we have also studied the adsorption kinetics of other metal ions, like Cd(II) and Pb(II) ions present in the aqueous solution.

### Catalytic Reaction:

To study the catalytic efficiency of these nanocomposites, reduction of *o*-NBA has been chosen as a model reaction. In a standard quartz cuvette of 1 cm path length, 0.02 g of metal/HNTs nanocomposites was taken along with 2.7 mL of aqueous solution of *o*-NBA (0.1 mM). Aqueous solution NaBH<sub>4</sub> (0.3 mL of 0.1M) was added to the reaction mixture and time dependent absorption spectra were recorded using a UV-Visible spectrophotometer at ~25 °C.

### Characterization:

Powder X-ray diffraction (XRD) data were collected on a PANalytical X-PERT PRO powder diffractometer using Cu K $\alpha$  radiation with 45 kV beam voltage and 40 mA beam current. Fourier transform infrared (FTIR) spectra were recorded using JASCO FT/IR 6300. Thermogravimetric analyses (TG) were performed on a Perkin Elmer DAIMOND TG/DTA instruments. Sulphur concentration in the surface modified HNTs has been estimated by ELTRA CS-800 Double Dual Range Carbon/Sulphur analyzer. The morphology of the halloysite nanotubes was characterized using transmission electron microscopy (TEM: FEI TECNAI G2 F20-ST) operating at 200 kV after drop casting a drop of solution on a carbon coated copper grid and field emission scanning electron microscopy (FESEM: FEI QUANTA FEG 250). High resolution transmission electron microscopy (HR-TEM) and Energy dispersive X-ray spectroscopy (EDS) have been done in the above mentioned TEM operating at 200 kV.

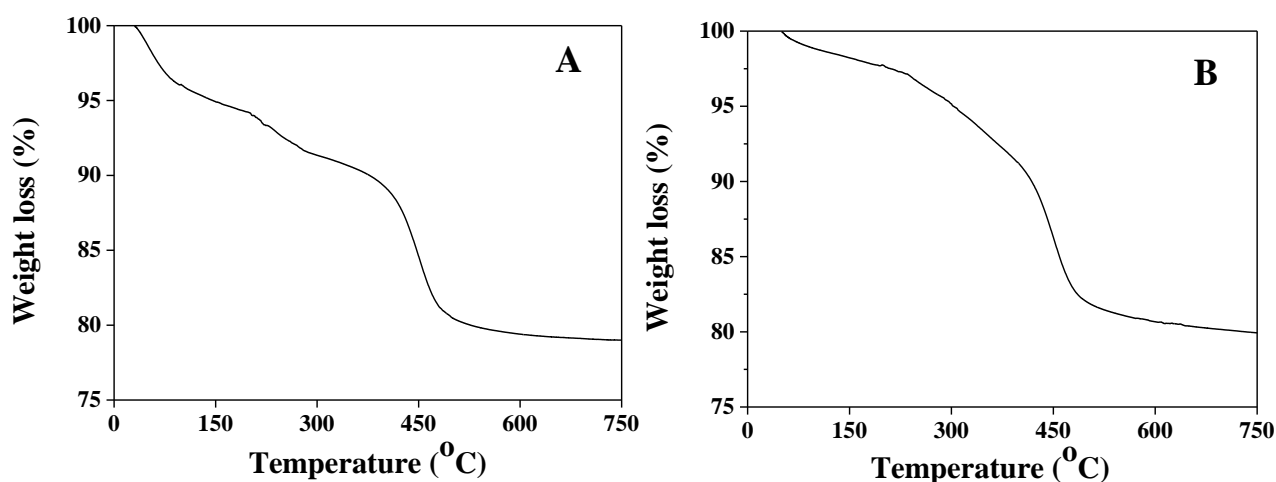

**Fig. S1** Thermogravimetric analysis (TGA) data of (A) HNTs and (B) surface modified HNTs measured under nitrogen from room temperature to 750°C.

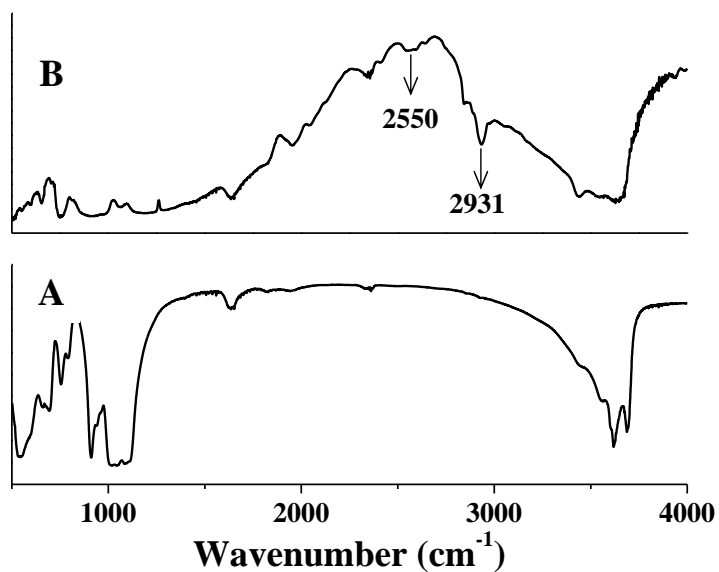

**Fig. S2** FTIR spectra of (A) HNTs and (B) surface modified HNTs by (3-mercaptopropyl) trimethoxysilane.

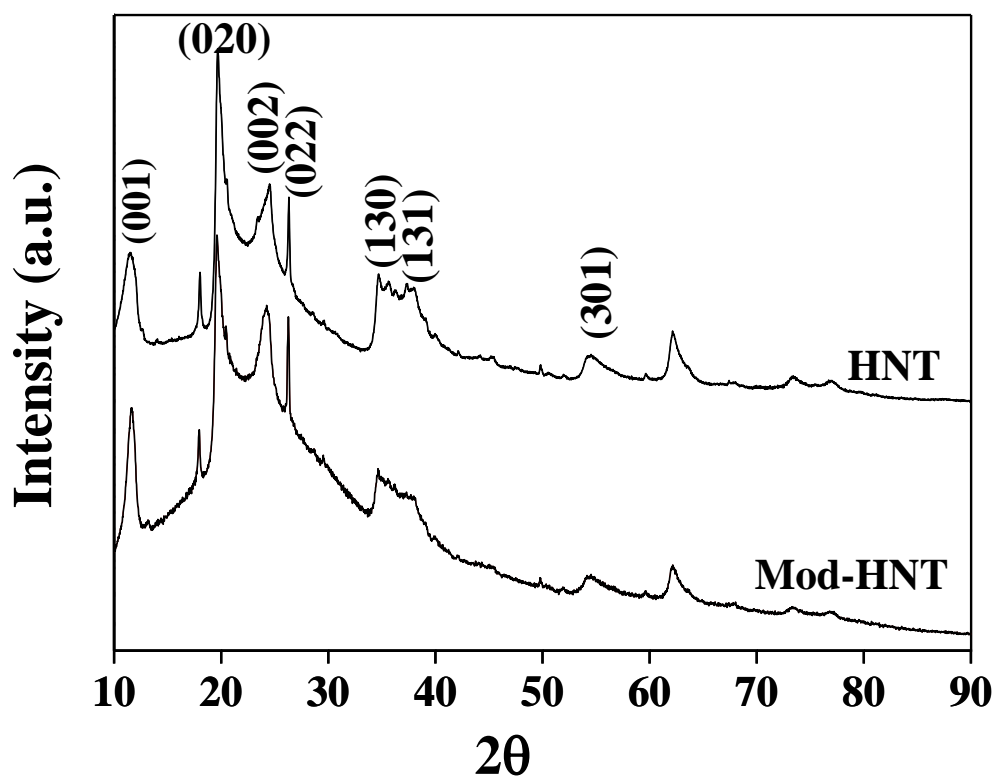

**Fig. S3** XRD patterns of HNTs before and after surface modification.

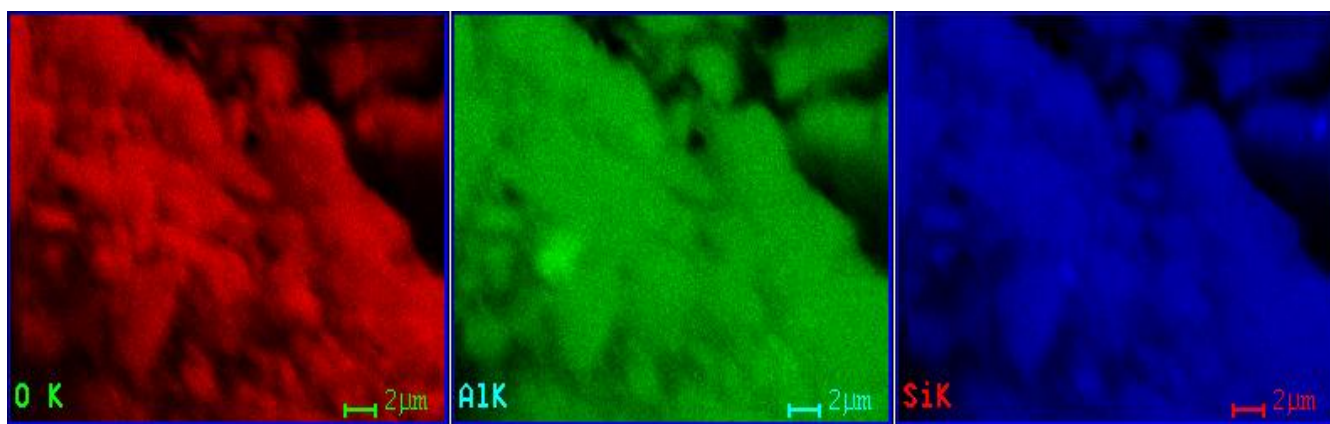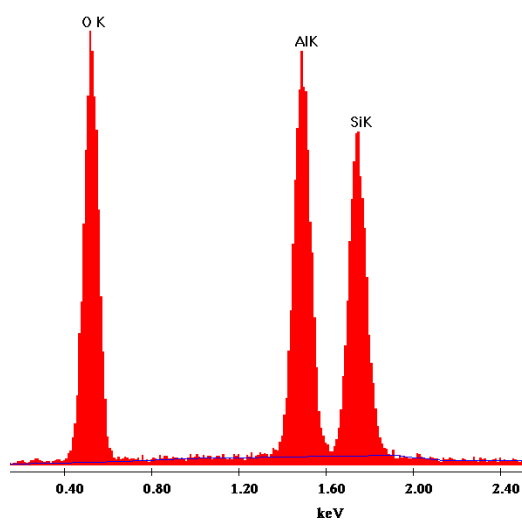

**Fig. S4** Element mapping by scanning electron microscopy and corresponding EDS spectrum of pure HNTs.

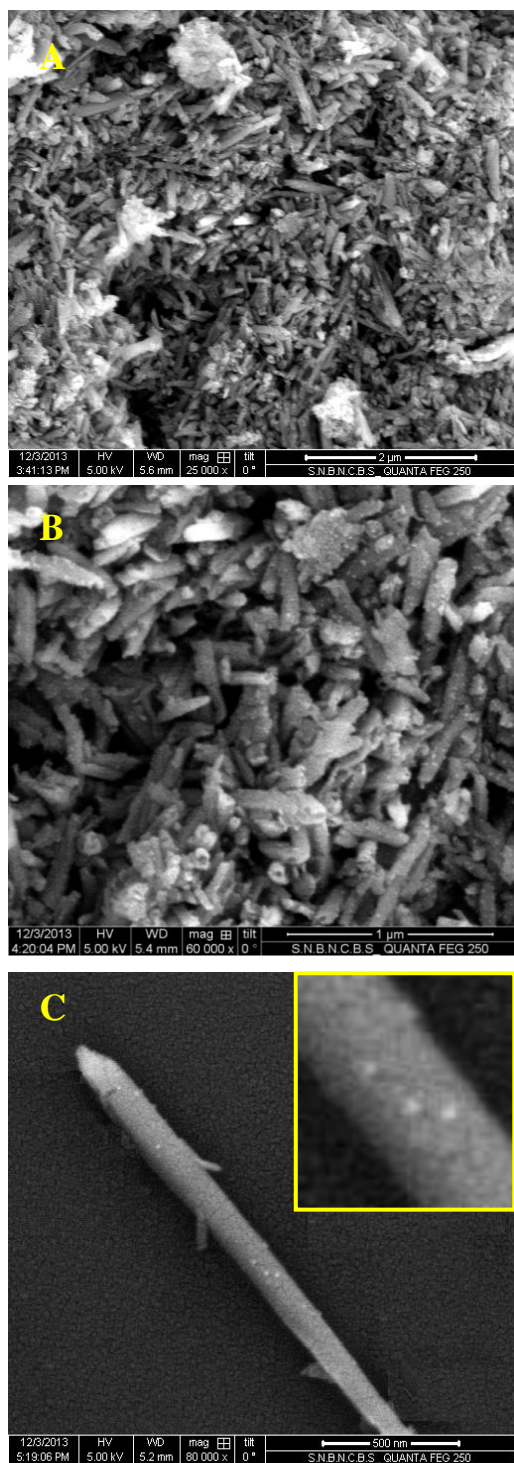

**Fig. S5** FESEM images of Au/HNTs nanocomposites at different magnification obtained by the immobilization of preformed Au NPs on modified HNTs surfaces.

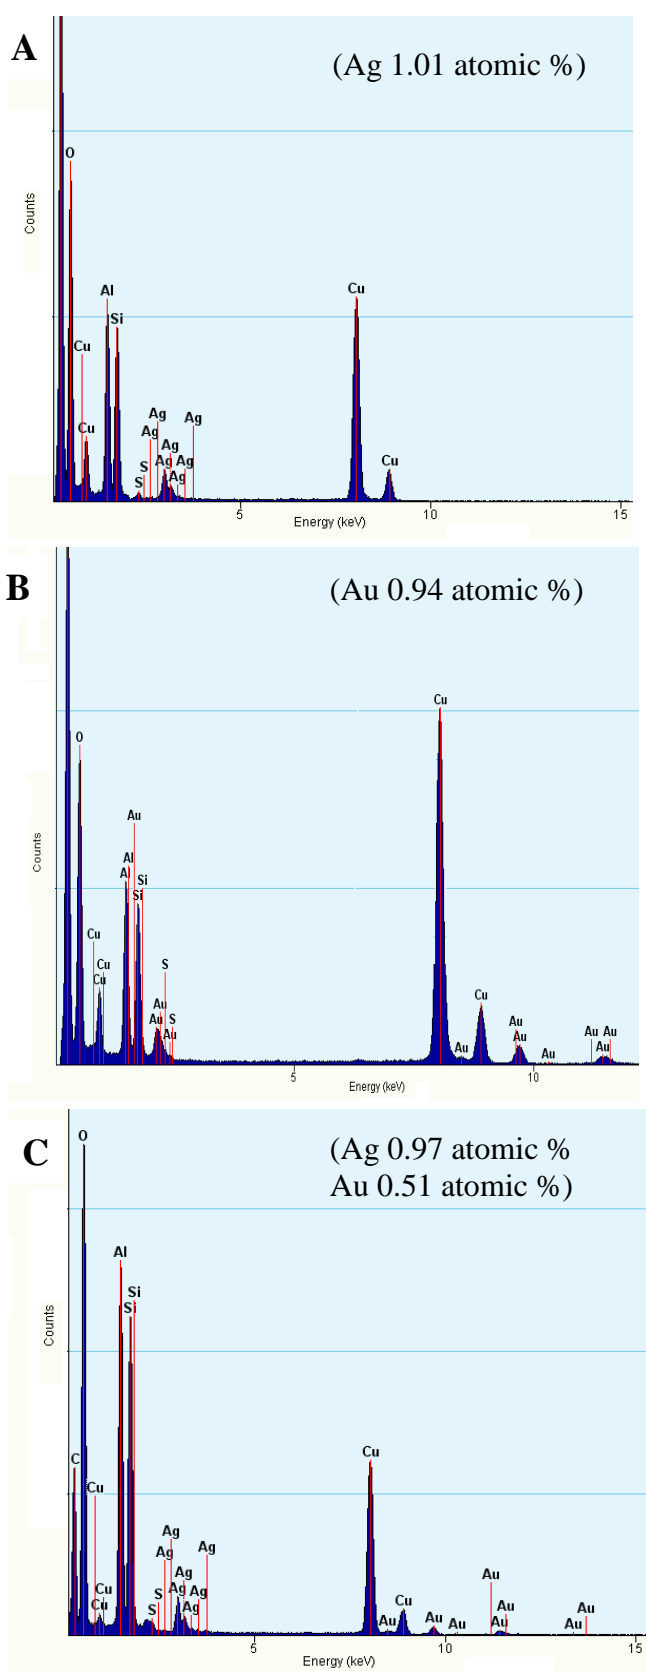

**Fig. S6** EDS spectra of (A) Ag/HNTs, (B) Au/HNTs, and (C) AuAg/HNTs nanocomposites demonstrating the presence of respective nanoparticles.

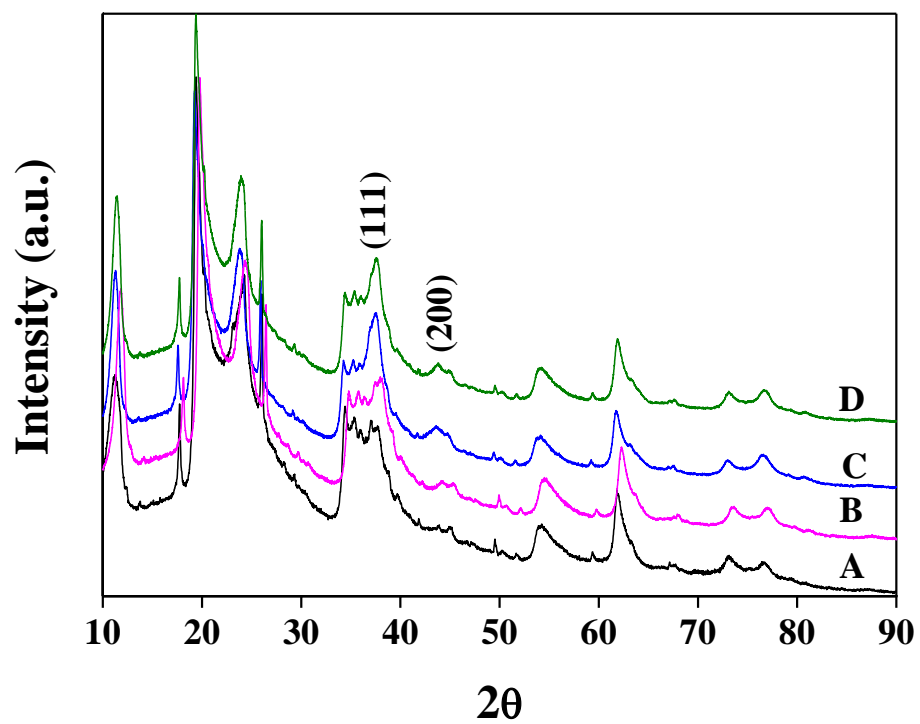

**Fig. S7** XRD patterns of (A) modified HNTs, (B) Ag/HNTs, (C) Au/HNTs, and (D) AuAg/HNTs nanocomposites.

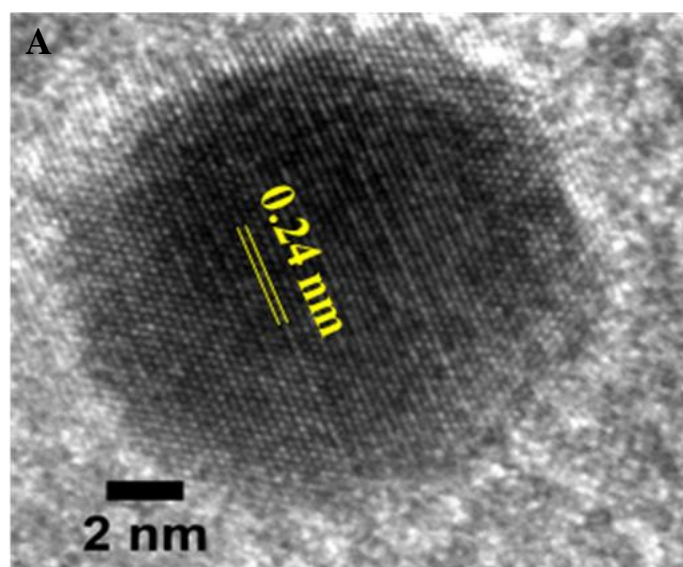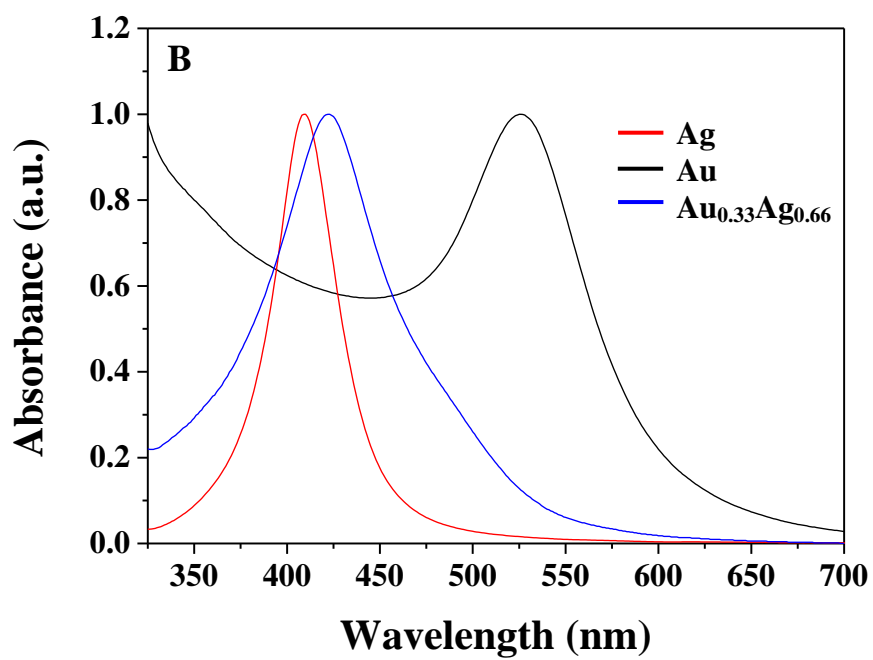

**Fig. S8** HRTEM images of (A)  $\text{Au}_{0.33}\text{Ag}_{0.66}$  NPs and (B) UV-Visible absorption spectra of Ag, Au, and  $\text{Au}_{0.33}\text{Ag}_{0.66}$  NPs.



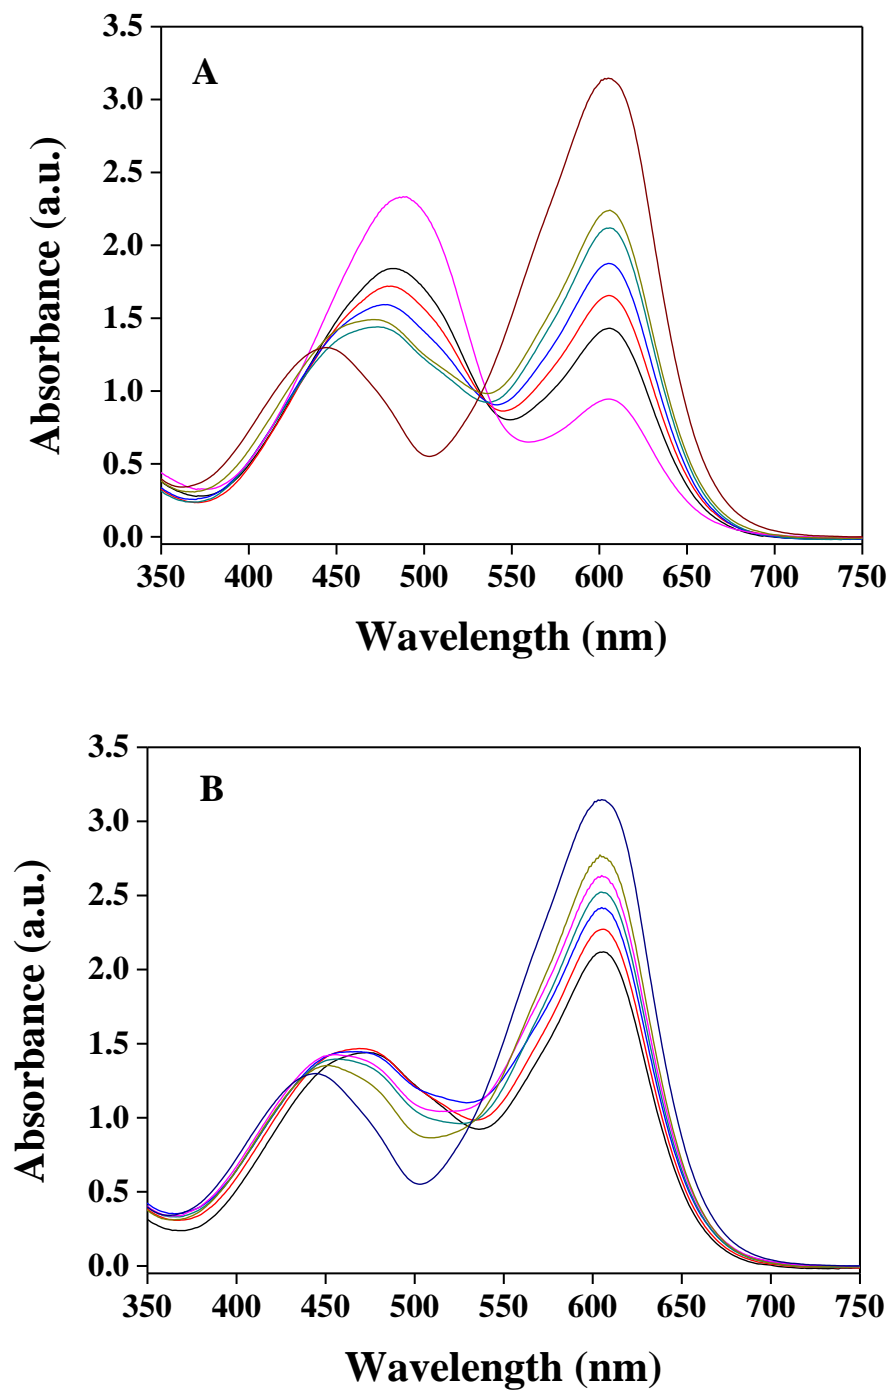

**Fig. S9** UV-Visible spectra of Hg(II)-diphenylthiocarbazonate complex for unbound Hg(II) ions present in the solution after the adsorption of Hg(II) ions by Mod-HNTs at an intervals of (A) 2 min and (B) 10 min respectively.

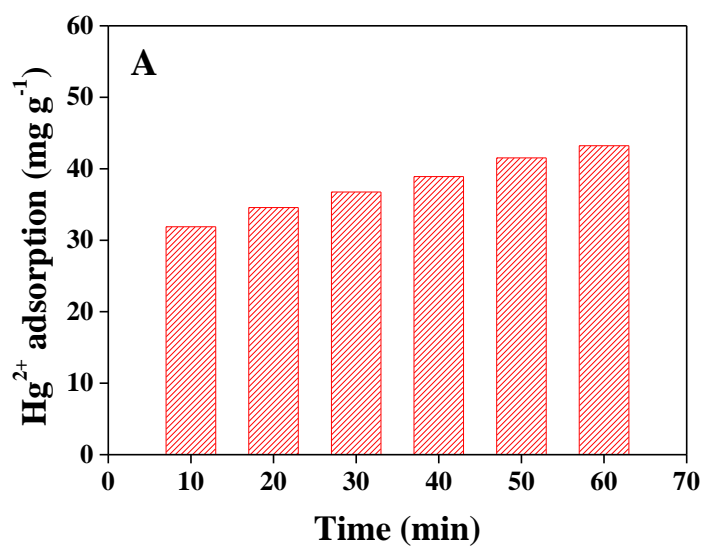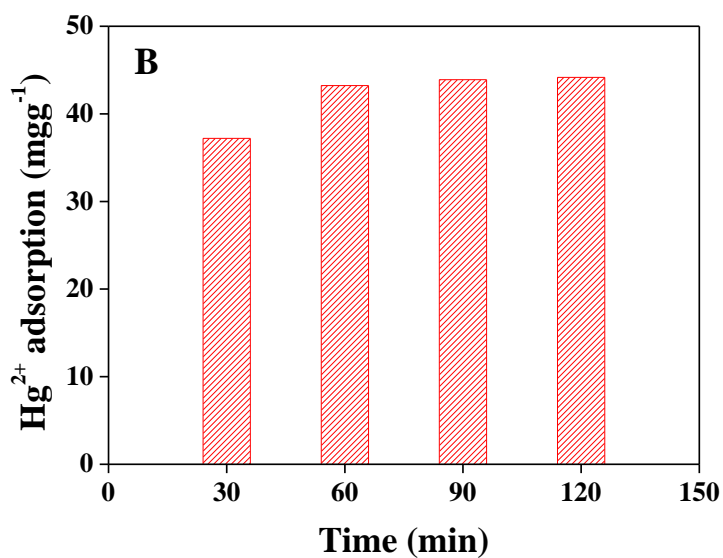

**Fig. S10** Adsorption of Hg(II) ions from the aqueous solution (200 mg/L) by modified HNTs as a function of time, at an interval of (A) 10 min and (B) 30 min, indicating adsorption of Hg(II) increases with time and finally reaches to a maximum 1h after the addition of the above adsorbent.

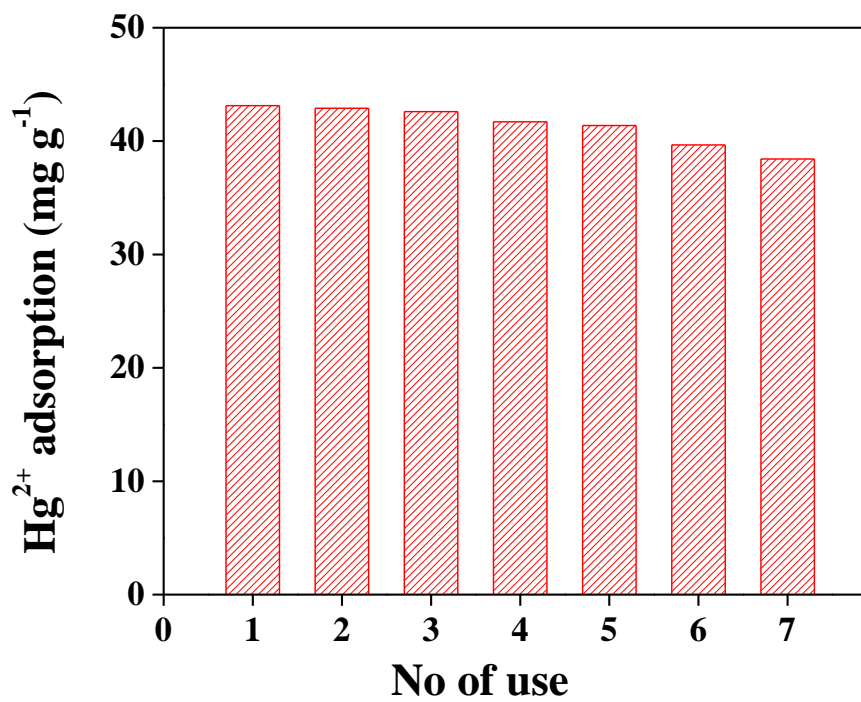

**Fig. S11** Adsorption efficiency of Mod-HNTs for Hg(II) ions from the aqueous solution (200 mg/L) using the same batch of surface modified HNTs.

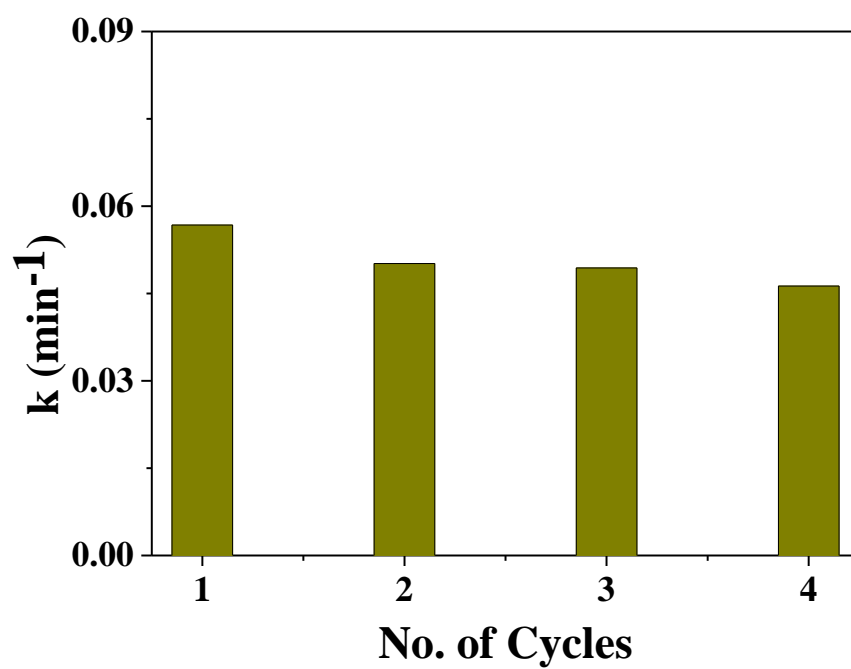

**Fig. S12** Reaction rate constant ( $k$ ) for the reduction of *o*-NBA over a number of cycles using the same batch of Ag/HNTs nanocomposites demonstrating stability and recyclability of the nanocomposite catalyst.
